# Supplementary material for: Absence of Rybp Compromises Neural Differentiation of Embryonic Stem Cells
Source: Hindawi journal article supplement (doi:10.1155/2016/4034620), 2015-12-15
Supplement: f1 [file 4034620.f1.zip]

Archive with 3 entries (3 files):
- Figure S1.ps
- Figure S2.ps
- Table S1.pdf
