# Supplementary material for: Absence of Rybp Compromises Neural Differentiation of Embryonic Stem Cells
Source: Hindawi journal article supplement (doi:10.1155/2016/4034620), 2015-12-15
Supplement: f1 [file 4034620.f1.zip › Table S1.pdf]

| Gene name | Forward primer sequence          | Reverse primer sequence            |
|-----------|----------------------------------|------------------------------------|
| Gfap      | 5'-AGATGAAACCAACCTGAGGC-3'       | 5'-CCTCCAGCGATTCAACCTTT-3'         |
| Hprt      | 5'-AGTCCCAGCGTCGTGATTAG-3'       | 5'-GCAAGTCTTTCAGTCCTGTCC-3'        |
| Nanog     | 5'-CAAGGGTCTGCTACTGAGATGCTCTG-3' | 5'-TTTTGTTTGGGACTGGTAGAAGAATCAG-3' |
| Nestin    | 5'-AGTGCCCAAGTTCTACTGGTGTCC-3'   | 5'-CCTCTAAAATAGAGTGGTGAGGGTTGA-3'  |
| NeuN      | 5'-AATACATTTGAGCTGCACCA-3'       | 5'-AACAAGCGTTTGCTCCAGT-3'          |
| NeuroD1   | 5'-CGAGTCATGAGTGCCCAAGCTTA-3'    | 5'-CCGGGAATAGTGAAACTGACGTG-3'      |
| Oct4      | 5'-AGCCGACAACAATGAGAACC-3'       | 5'-TCTCCAGACTCCACCTCACA-3'         |
| Olig2     | 5'-CGCAGCGAGCACCTCAAATCTAA-3'    | 5'-CCCAGGGATGATCTAAGCTCTCGAA-3'    |
| Pax6      | 5'-CTTGGGAAATCCGAGACAGA-3'       | 5'-CTAGCCAGGTTGCGAAGAAC-3'         |
| Plagl1    | 5'-ATGGCTCCATTCCGCTGTC-3'        | 5'-CTCAGCCTTCGAGCACTTGAA-3'        |
| Rybp      | 5'-TTAGGAACAGCGCCGAAG-3'         | 5'-GCCACCAGCTGAGAATTGAT-3'         |
| Sox2      | 5'-GCAGTACAACTCCATGACCA-3'       | 5'-TAGGACATGCTGTAGGTGGG-3'         |
| Tubb3     | 5'-TGAGGCCTCCTCTCACAAGT-3'       | 5'-GGCCTGAATAGGTGTCCAAA-3'         |

**Table 1 - List of primers used in this study**
